# Supplementary material for: Local environment in biopsy better predict the pathological response to neoadjuvant chemoradiotherapy in rectal cancer
Source: PubMed Central journal article supplement (PMC6434387; doi:10.1042/bsr20190003), 2019-03-26
Supplement: bsr-39-bsr20190003_Supp1.pdf [file bsr-39-bsr20190003_Supp1.pdf]

305 patients with rectal cancer  
accepted nCRT

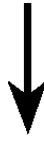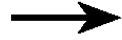

134 tumor biopsy not available  
11 no tumor in biopsy sample

160 biopsy samples

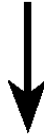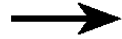

6 tumor recurrent  
10 no TRG data  
3 no surgery

141 analysed
